# Supplementary material for: Series of novel 3D microporous heterometallic 3d–4f coordination frameworks with (5,6)-connected topology: synthesis, crystal structure and magnetic properties
Source: Royal Society of Chemistry journal article supplement (doi:10.1039/c3ce40346g), 2013-01-01
Supplement: c3ce40346g.pdf [file c3ce40346g.pdf]

## Supplementary Materials

### **Series of novel 3D microporous heterometallic 3d-4f coordination frameworks with (5, 6) -connected topology: Synthesis, crystal structure and magnetic properties**

**ChuJun Chen,<sup>a</sup> Ning Wang,<sup>b</sup> Yi Long,<sup>b</sup> JinYing Gao,<sup>a</sup> WeiPing Xie,<sup>a</sup> XingRui Ran,<sup>a</sup>  
ShanTang Yue,<sup>\*a</sup>**

*<sup>a</sup> School of Chemistry and Environment, South China Normal University, Guangzhou*

*510006, PR China*

*<sup>b</sup> School of Materials Science and Engineering, Nanyang Technological University,*

*50 Nanyang Avenue, 639798 (Singapore)*

*\* To whom correspondence should be addressed. E-mail: [yuesht@scnu.edu.cn](mailto:yuesht@scnu.edu.cn);*

*Tel./fax: +86 20 39310187.*

---

**Table S1** Selected bond distances (Å) and angles (°) for complexes **1-5**.

| <b>Compound 1</b>  |            |                     |            |
|--------------------|------------|---------------------|------------|
| Eu(1)-O(2)         | 2.304(4)   | Cu(1)-N(3)#2        | 1.980(4)   |
| Eu(1)-O(3)         | 2.402(3)   | Cu(1)-N(3)          | 1.980(4)   |
| Eu(1)-O(5)         | 2.530(4)   | Cu(1)-N(5)#3        | 2.041(4)   |
| Eu(1)-O(6)         | 2.441(4)   | Cu(1)-N(5)#4        | 2.041(4)   |
| Eu(1)-O(7)         | 2.470(3)   | Cu(1)-O(4)#2        | 2.411(3)   |
| Eu(1)-O(8)         | 2.472(4)   | Cu(1)-O(4)          | 2.411(3)   |
| Eu(1)-O(3)#1       | 2.587(3)   | Cu(2)-N(1)          | 1.967(4)   |
| Eu(1)-O(4)#1       | 2.546(3)   | Cu(2)-N(1)#5        | 1.967(4)   |
| Eu(1)-O(1W)        | 2.424(4)   | Cu(2)-N(4)#6        | 2.058(4)   |
| O(2)-Eu(1)-O(3)    | 79.11(12)  | Cu(2)-N(4)#7        | 2.058(4)   |
| O(2)-Eu(1)-O(1W)   | 93.54(16)  | Cu(2)-O(1)#5        | 2.412(4)   |
| O(2)-Eu(1)-O(6)    | 80.36(14)  | Cu(2)-O(1)          | 2.412(4)   |
| O(3)-Eu(1)-O(6)    | 78.29(12)  | N(3)#2-Cu(1)-N(3)   | 179.999(2) |
| O(1W)-Eu(1)-O(6)   | 122.72(14) | N(3)#2-Cu(1)-N(5)#3 | 90.19(16)  |
| O(2)-Eu(1)-O(7)    | 124.63(12) | N(3)-Cu(1)-N(5)#3   | 89.81(16)  |
| O(3)-Eu(1)-O(7)    | 88.90(12)  | N(3)#2-Cu(1)-N(5)#4 | 89.81(16)  |
| O(1W)-Eu(1)-O(7)   | 76.97(14)  | N(3)-Cu(1)-N(5)#4   | 90.19(16)  |
| O(6)-Eu(1)-O(7)    | 149.46(14) | N(5)#3-Cu(1)-N(5)#4 | 180.0(2)   |
| O(2)-Eu(1)-O(8)    | 71.90(13)  | N(3)#2-Cu(1)-O(4)#2 | 75.13(14)  |
| O(3)-Eu(1)-O(8)    | 78.27(13)  | N(3)-Cu(1)-O(4)#2   | 104.87(14) |
| O(1W)-Eu(1)-O(8)   | 78.34(15)  | N(5)#3-Cu(1)-O(4)#2 | 88.97(14)  |
| O(6)-Eu(1)-O(8)    | 146.45(14) | N(5)#4-Cu(1)-O(4)#2 | 91.03(14)  |
| O(7)-Eu(1)-O(8)    | 52.73(12)  | N(3)#2-Cu(1)-O(4)   | 104.87(14) |
| O(2)-Eu(1)-O(5)    | 79.04(12)  | N(3)-Cu(1)-O(4)     | 75.13(14)  |
| O(3)-Eu(1)-O(5)    | 128.52(12) | N(5)#3-Cu(1)-O(4)   | 91.03(14)  |
| O(1W)-Eu(1)-O(5)   | 70.46(13)  | N(5)#4-Cu(1)-O(4)   | 88.97(14)  |
| O(6)-Eu(1)-O(5)    | 52.38(12)  | O(4)#2-Cu(1)-O(4)   | 180.0      |
| O(7)-Eu(1)-O(5)    | 140.99(12) | N(1)-Cu(2)-N(1)#5   | 180.00     |
| O(8)-Eu(1)-O(5)    | 135.47(14) | N(1)-Cu(2)-N(4)#6   | 90.49(17)  |
| O(2)-Eu(1)-O(4)#1  | 157.05(11) | N(1)#5-Cu(2)-N(4)#6 | 89.51(17)  |
| O(3)-Eu(1)-O(4)#1  | 113.70(11) | N(1)-Cu(2)-N(4)#7   | 89.51(17)  |
| O(1W)-Eu(1)-O(4)#1 | 81.26(15)  | N(1)#5-Cu(2)-N(4)#7 | 90.49(17)  |
| O(6)-Eu(1)-O(4)#1  | 83.73(13)  | N(4)#6-Cu(2)-N(4)#7 | 180.00(1)  |
| O(7)-Eu(1)-O(4)#1  | 76.18(11)  | N(1)-Cu(2)-O(1)#5   | 104.36(15) |
| O(8)-Eu(1)-O(4)#1  | 127.91(12) | N(1)#5-Cu(2)-O(1)#5 | 75.64(14)  |
| O(5)-Eu(1)-O(4)#1  | 78.16(12)  | N(4)#6-Cu(2)-O(1)#5 | 89.65(15)  |
| O(2)-Eu(1)-O(3)#1  | 138.43(12) | N(4)#7-Cu(2)-O(1)#5 | 90.35(15)  |
| O(3)-Eu(1)-O(3)#1  | 63.25(13)  | N(1)-Cu(2)-O(1)     | 75.64(15)  |
| O(1W)-Eu(1)-O(3)#1 | 127.99(15) | N(1)#5-Cu(2)-O(1)   | 104.36(14) |
| O(6)-Eu(1)-O(3)#1  | 75.52(12)  | N(4)#6-Cu(2)-O(1)   | 90.35(15)  |
| O(7)-Eu(1)-O(3)#1  | 73.96(12)  | N(4)#7-Cu(2)-O(1)   | 89.65(15)  |
| O(8)-Eu(1)-O(3)#1  | 113.91(12) | O(1)#5-Cu(2)-O(1)   | 180.00     |

| <b>Compound 2</b>  |            |                     |            |
|--------------------|------------|---------------------|------------|
| Tb(1)-O(2)         | 2.288(3)   | Cu(1)-N(3)#2        | 1.976(4)   |
| Tb(1)-O(3)         | 2.365(4)   | Cu(1)-N(3)          | 1.976(4)   |
| Tb(1)-O(1W)        | 2.399(5)   | Cu(1)-N(5)#3        | 2.036(4)   |
| Tb(1)-O(6)         | 2.409(4)   | Cu(1)-N(5)#4        | 2.036(4)   |
| Tb(1)-O(7)         | 2.441(3)   | Cu(1)-O(4)#2        | 2.391(3)   |
| Tb(1)-O(8)         | 2.447(3)   | Cu(1)-O(4)          | 2.391(3)   |
| Tb(1)-O(5)         | 2.510(3)   | Cu(2)-N(1)          | 1.969(4)   |
| Tb(1)-O(4)#1       | 2.523(3)   | Cu(2)-N(1)#5        | 1.969(4)   |
| Tb(1)-O(3)#1       | 2.565(3)   | Cu(2)-N(4)#6        | 2.056(4)   |
| O(2)-Tb(1)-O(3)    | 80.47(12)  | Cu(2)-N(4)#7        | 2.056(4)   |
| O(2)-Tb(1)-O(1W)   | 92.90(14)  | Cu(2)-O(1)          | 2.413(4)   |
| O(3)-Tb(1)-O(1W)   | 156.32(11) | Cu(2)-O(1)#5        | 2.413(4)   |
| O(2)-Tb(1)-O(6)    | 79.67(12)  | N(3)-Cu(1)-N(3)#2   | 180.0(2)   |
| O(3)-Tb(1)-O(6)    | 78.71(12)  | N(3)-Cu(1)-N(5)#3   | 90.00(16)  |
| O(1W)-Tb(1)-O(6)   | 122.71(13) | N(3)#2-Cu(1)-N(5)#3 | 90.00(16)  |
| O(2)-Tb(1)-O(7)    | 125.35(11) | N(3)-Cu(1)-N(5)#4   | 90.00(16)  |
| O(3)-Tb(1)-O(7)    | 88.18(12)  | N(3)#2-Cu(1)-N(5)#4 | 90.00(16)  |
| O(1W)-Tb(1)-O(7)   | 77.12(13)  | N(5)#3-Cu(1)-N(5)#4 | 179.998(1) |
| O(6)-Tb(1)-O(7)    | 149.60(13) | N(3)-Cu(1)-O(4)     | 75.54(14)  |
| O(2)-Tb(1)-O(8)    | 72.00(12)  | N(3)#2-Cu(1)-O(4)   | 104.25(14) |
| O(3)-Tb(1)-O(8)    | 78.31(13)  | N(5)#3-Cu(1)-O(4)   | 90.92(14)  |
| O(1W)-Tb(1)-O(8)   | 78.02(14)  | N(5)#4-Cu(1)-O(4)   | 89.08(14)  |
| O(6)-Tb(1)-O(8)    | 145.94(14) | N(3)-Cu(1)-O(4)#2   | 104.25(14) |
| O(7)-Tb(1)-O(8)    | 53.35(12)  | N(3)#2-Cu(1)-O(4)#2 | 75.54(14)  |
| O(2)-Tb(1)-O(5)    | 78.38(11)  | N(5)#3-Cu(1)-O(4)#2 | 89.08(14)  |
| O(3)-Tb(1)-O(5)    | 129.71(12) | N(5)#4-Cu(1)-O(4)#2 | 90.92(14)  |
| O(1W)-Tb(1)-O(5)   | 69.88(13)  | O(4)-Cu(1)-O(4)#2   | 180.00     |
| O(6)-Tb(1)-O(5)    | 52.91(13)  | N(1)-Cu(2)-N(1)#5   | 180.00     |
| O(7)-Tb(1)-O(5)    | 140.45(13) | N(1)-Cu(2)-N(4)#6   | 89.18(16)  |
| O(8)-Tb(1)-O(5)    | 134.63(12) | N(1)#5-Cu(2)-N(4)#6 | 90.82(16)  |
| O(2)-Tb(1)-O(4)#1  | 156.40(10) | N(1)-Cu(2)-N(4)#7   | 90.82(16)  |
| O(3)-Tb(1)-O(4)#1  | 113.91(11) | N(1)#5-Cu(2)-N(4)#7 | 89.18(16)  |
| O(1W)-Tb(1)-O(4)#1 | 80.57(13)  | N(4)#6-Cu(2)-N(4)#7 | 180.0      |
| O(6)-Tb(1)-O(4)#1  | 84.85(12)  | N(1)-Cu(2)-O(1)     | 75.44(15)  |
| O(7)-Tb(1)-O(4)#1  | 75.53(10)  | N(1)#5-Cu(2)-O(1)   | 104.56(15) |
| O(8)-Tb(1)-O(4)#1  | 127.63(12) | N(4)#6-Cu(2)-O(1)   | 89.80(14)  |
| O(5)-Tb(1)-O(4)#1  | 78.08(11)  | N(4)#7-Cu(2)-O(1)   | 90.20(14)  |
| O(2)-Tb(1)-O(3)#1  | 138.94(13) | N(1)-Cu(2)-O(1)#5   | 104.56(15) |
| O(3)-Tb(1)-O(3)#1  | 62.78(13)  | N(1)#5-Cu(2)-O(1)#5 | 75.44(15)  |
| O(1W)-Tb(1)-O(3)#1 | 128.09(13) | N(4)#6-Cu(2)-O(1)#5 | 90.20(14)  |
| O6-Tb(1)-(3)#1     | 75.93(12)  | N(4)#7-Cu(2)-O(1)#5 | 89.80(14)  |

|                     |            |                       |            |
|---------------------|------------|-----------------------|------------|
| O(7)-Tb(1)-O(3)#1   | 73.68(11)  | O(1)-Cu(2)-O(1)#5     | 180.00(1)  |
| O(8)-Tb(1)-O(3)#1   | 114.35(11) | O(4)#1-Tb(1)-O(3)#1   | 51.14(11)  |
| O(5)-Tb(1)-O(3)#1   | 100.62(10) |                       |            |
| <b>Compound 3</b>   |            |                       |            |
| Gd(1)-O(7)          | 2.296(6)   | Cu(1)-N(3)#2          | 1.995(7)   |
| Gd(1)-O(15)         | 2.374(6)   | Cu(1)-N(3)#3          | 1.995(7)   |
| Gd(1)-O(3)          | 2.424(6)   | Cu(1)-N(5)#4          | 2.045(7)   |
| Gd(1)-O(1W)         | 2.415(7)   | Cu(1)-N(5)            | 2.045(7)   |
| Gd(1)-O(2)          | 2.457(6)   | Cu(1)-O(30)#2         | 2.405(6)   |
| Gd(1)-O(1)          | 2.455(7)   | Cu(1)-O(30)#3         | 2.405(6)   |
| Gd(1)-O(4)          | 2.513(6)   | Cu(2)-N(1)#5          | 1.965(7)   |
| Gd(1)-O(30)#1       | 2.533(6)   | Cu(2)-N(1)#6          | 1.965(7)   |
| Gd(1)-O(15)#1       | 2.585(6)   | Cu(2)-N(4)#7          | 2.053(7)   |
| O(7)-Gd(1)-O(15)    | 79.6(2)    | Cu(2)-N(4)            | 2.053(7)   |
| O(7)-Gd(1)-O(3)     | 80.2(2)    | Cu(2)-O(12)#5         | 2.402(7)   |
| O(15)-Gd(1)-O(3)    | 78.6(2)    | Cu(2)-O(12)#6         | 2.402(7)   |
| O(7)-Gd(1)-O(1W)    | 93.5(3)    | N(3)#2-Cu(1)-N(3)#3   | 180.00(4)  |
| O(15)-Gd(1)-O(1W)   | 156.1(2)   | N(3)#2-Cu(1)-N(5)#4   | 89.0(3)    |
| O(3)-Gd(1)-O(1W)    | 123.2(2)   | N(3)#3-Cu(1)-N(5)#4   | 91.0(3)    |
| O(7)-Gd(1)-O(2)     | 124.8(2)   | N(3)#2-Cu(1)-N(5)     | 91.0(3)    |
| O(15)-Gd(1)-O(2)    | 88.3(2)    | N(3)#3-Cu(1)-N(5)     | 89.0(3)    |
| O(3)-Gd(1)-O(2)     | 149.4(2)   | N(5)#4-Cu(1)-N(5)     | 179.999(1) |
| O(1W)-Gd(1)-O(2)    | 76.8(2)    | N(3)#2-Cu(1)-O(30)#2  | 75.00(2)   |
| O(7)-Gd(1)-O(1)     | 71.9(2)    | N(3)#3-Cu(1)-O(30)#2  | 105.00(2)  |
| O(15)-Gd(1)-O(1)    | 78.2(2)    | N(5)#4-Cu(1)-O(30)#2  | 91.20(2)   |
| O(3)-Gd(1)-O(1)     | 146.3(2)   | N(5)-Cu(1)-O(30)#2    | 88.80(2)   |
| O(1W)-Gd(1)-O(1)    | 77.9(3)    | N(3)#2-Cu(1)-O(30)#3  | 105.00(2)  |
| O(2)-Gd(1)-O(1)     | 52.9(2)    | N(3)#3-Cu(1)-O(30)#3  | 75.00(2)   |
| O(7)-Gd(1)-O(4)     | 78.9(2)    | N(5)#4-Cu(1)-O(30)#3  | 88.80(2)   |
| O(15)-Gd(1)-O(4)    | 129.3(2)   | N(5)-Cu(1)-O(30)#3    | 91.20(2)   |
| O(3)-Gd(1)-O(4)     | 52.8(2)    | O(30)#2-Cu(1)-O(30)#3 | 180.0      |
| O(1W)-Gd(1)-O(4)    | 70.5(2)    | N(1)#5-Cu(2)-N(1)#6   | 180.0(3)   |
| O(2)-Gd(1)-O(4)     | 140.9(2)   | N(1)#5-Cu(2)-N(4)#7   | 89.5(3)    |
| O(1)-Gd(1)-O(4)     | 135.0(2)   | N(1)#6-Cu(2)-N(4)#7   | 90.5(3)    |
| O(7)-Gd(1)-O(30)#1  | 156.8(2)   | N(1)#5-Cu(2)-N(4)     | 90.5(3)    |
| O(15)-Gd(1)-O(30)#1 | 114.02(19) | N(1)#6-Cu(2)-N(4)     | 89.5(3)    |
| O(3)-Gd(1)-O(30)#1  | 84.2(2)    | N(4)#7-Cu(2)-N(4)     | 179.999(2) |
| O(1W)-Gd(1)-O(30)#1 | 80.7(2)    | N(1)#5-Cu(2)-O(12)#5  | 75.4(3)    |
| O(2)-Gd(1)-O(30)#1  | 76.0(2)    | N(1)#6-Cu(2)-O(12)#5  | 104.6(3)   |
| O(1)-Gd(1)-O(30)#1  | 127.7(2)   | N(4)#7-Cu(2)-O(12)#5  | 89.8(3)    |
| O(4)-Gd(1)-O(30)#1  | 78.0(2)    | N(4)-Cu(2)-O(12)#5    | 90.2(3)    |
| O(7)-Gd(1)-O(15)#1  | 138.2(2)   | N(1)#5-Cu(2)-O(12)#6  | 104.6(3)   |
| O(15)-Gd(1)-O(15)#1 | 62.9(2)    | N(1)#6-Cu(2)-O(12)#6  | 75.4(3)    |
| O(3)-Gd(1)-O(15)#1  | 75.2(2)    | N(4)#7-Cu(2)-O(12)#6  | 90.2(3)    |

|                     |           |                       |            |
|---------------------|-----------|-----------------------|------------|
| O(1W)-Gd(1)-O(15)#1 | 128.2(2)  | N(4)-Cu(2)-O(12)#6    | 89.8(3)    |
| O(2)-Gd(1)-O(15)#1  | 74.2(2)   | O(12)#5-Cu(2)-O(12)#6 | 179.999(2) |
| O(1)-Gd(1)-O(15)#1  | 114.3(2)  | O(30)#1-Gd(1)-O(15)#1 | 51.16(18)  |
| O(4)-Gd(1)-O(15)#1  | 110.3(2)  |                       |            |
| <b>Compound 4</b>   |           |                       |            |
| Dy(1)-O(2)          | 2.241(11) | Cu(1)-N(3)#2          | 1.990(12)  |
| Dy(1)-O(3)          | 2.349(10) | Cu(1)-N(3)            | 1.990(12)  |
| Dy(1)-O(1W)         | 2.358(15) | Cu(1)-N(5)#3          | 2.056(11)  |
| Dy(1)-O(6)          | 2.394(13) | Cu(1)-N(5)#4          | 2.056(11)  |
| Dy(1)-O(7)          | 2.416(11) | Cu(1)-O(4)#2          | 2.378(10)  |
| Dy(1)-O(8)          | 2.435(11) | Cu(1)-O(4)            | 2.378(10)  |
| Dy(1)-O(5)          | 2.500(10) | Cu(2)-N(1)            | 1.971(14)  |
| Dy(1)-O(3)#1        | 2.546(9)  | Cu(2)-N(1)#5          | 1.971(14)  |
| Dy(1)-O(4)#1        | 2.527(10) | Cu(2)-N(4)#6          | 2.056(12)  |
| O(2)-Dy(1)-O(3)     | 80.8(4)   | Cu(2)-N(4)#7          | 2.056(12)  |
| O(2)-Dy(1)-O(1W)    | 92.5(5)   | Cu(2)-O(1) # 5        | 2.424(12)  |
| O(3)-Dy(1)-O(1W)    | 156.3(3)  | Cu(2)-O(1)            | 2.424(12)  |
| O(2)-Dy(1)-O(6)     | 79.0(4)   | N(3)#2-Cu(1)-N(3)     | 179.999(2) |
| O(3)-Dy(1)-O(6)     | 78.9(4)   | N(3)#2-Cu(1)-N(5)#3   | 90.7(5)    |
| O(1W)-Dy(1)-O(6)    | 122.4(4)  | N(3)-Cu(1)-N(5)#3     | 89.3(5)    |
| O(2)-Dy(1)-O(7)     | 125.6(4)  | N(3)#2-Cu(1)-N(5)#4   | 89.3(5)    |
| O(3)-Dy(1)-O(7)     | 87.1(4)   | N(3)-Cu(1)-N(5)#4     | 90.7(5)    |
| O(1W)-Dy(1)-O(7)    | 78.3(4)   | N(5)#3-Cu(1)-N(5)#4   | 180.0(7)   |
| O(6)-Dy(1)-O(7)     | 149.5(4)  | N(3)#2-Cu(1)-O(4)#2   | 75.5(4)    |
| O(2)-Dy(1)-O(8)     | 71.7(4)   | N(3)-Cu(1)-O(4)#2     | 104.5(4)   |
| O(3)-Dy(1)-O(8)     | 78.4(4)   | N(5)#3-Cu(1)-O(4)#2   | 89.4(4)    |
| O(6)-Dy(1)-O(8)     | 145.3(4)  | N(5)#4-Cu(1)-O(4)#2   | 90.6(4)    |
| O(7)-Dy(1)-O(8)     | 53.9(4)   | N(3)#2-Cu(1)-O(4)     | 104.5(4)   |
| O(2)-Dy(1)-O(5)     | 78.6(4)   | N(3)-Cu(1)-O(4)       | 75.5(4)    |
| O(3)-Dy(1)-O(5)     | 130.3(4)  | N(5)#3-Cu(1)-O(4)     | 90.6(4)    |
| O(1W)-Dy(1)-O(5)    | 69.4(4)   | N(5)#4-Cu(1)-O(4)     | 89.4(4)    |
| O(1W)-Dy(1)-O(8)    | 77.9(4)   | O(4)#2-Cu(1)-O(4)     | 179.999(1) |
| O(6)-Dy(1)-O(5)     | 53.0(4)   | N(1)-Cu(2)-N(1)#5     | 179.999(1) |
| O(7)-Dy(1)-O(5)     | 140.8(4)  | N(1)-Cu(2)-N(4)#6     | 88.7(5)    |
| O(8)-Dy(1)-O(5)     | 134.2(4)  | N(1)#5-Cu(2)-N(4)#6   | 91.3(5)    |
| O(2)-Dy(1)-O(3)#1   | 138.3(4)  | N(1)-Cu(2)-N(4)#7     | 91.3(5)    |
| O(3)-Dy(1)-O(3)#1   | 62.1(4)   | N(1)#5-Cu(2)-N(4)#7   | 88.7(5)    |
| O(1W)-Dy(1)-O(3)#1  | 129.1(4)  | N(4)#6-Cu(2)-N(4)#7   | 179.999(1) |
| O(6)-Dy(1)-O(3)#1   | 76.0(4)   | N(1)-Cu(2)-O(1)#5     | 105.8(5)   |
| O(7)-Dy(1)-O(3)#1   | 73.5(4)   | N(1)#5-Cu(2)-O(1)#5   | 74.2(5)    |
| O(8)-Dy(1)-O(3)#1   | 115.0(3)  | N(4)#6-Cu(2)-O(1)#5   | 90.9(5)    |
| O(5)-Dy(1)-O(3)#1   | 110.4(3)  | N(4)#7-Cu(2)-O(1)#5   | 89.1(5)    |
| O(2)-Dy(1)-O(4)#1   | 156.0(3)  | N(1)-Cu(2)-O(1)       | 74.2(5)    |
| O(3)-Dy(1)-O(4)#1   | 114.2(3)  | N(1)#5-Cu(2)-O(1)     | 105.8(5)   |

|                    |            |                     |            |
|--------------------|------------|---------------------|------------|
| O(1)#5-Cu(2)-O(1)  | 179.999(1) | N(4)#6-Cu(2)-O(1)   | 89.1(5)    |
|                    |            | N(4)#7-Cu(2)-O(1)   | 90.9(5)    |
| <b>Compound 5</b>  |            |                     |            |
| Ho(1)-O(2)         | 2.270(4)   | Cu(1)-N(3)          | 1.985(4)   |
| Ho(1)-O(3)         | 2.337(4)   | Cu(1)-N(3)#2        | 1.985(4)   |
| Ho(1)-O(1W)        | 2.370(5)   | Cu(1)-N(5)#3        | 2.032(4)   |
| Ho(1)-O(6)         | 2.390(4)   | Cu(1)-N(5)#4        | 2.032(4)   |
| Ho(1)-O(7)         | 2.420(3)   | Cu(1)-O(4)          | 2.393(4)   |
| Ho(1)-O(8)         | 2.426(4)   | Cu(1)-O(4)#2        | 2.393(4)   |
| Ho(1)-O(5)         | 2.489(3)   | Cu(2)-N(1)          | 1.973(4)   |
| Ho(1)-O(4)#1       | 2.498(3)   | Cu(2)-N(1)#5        | 1.973(4)   |
| Ho(1)-O(3)#1       | 2.548(4)   | Cu(2)-N(4)#6        | 2.048(4)   |
| O(2)-Ho(1)-O(3)    | 80.57(13)  | Cu(2)-N(4)#7        | 2.048(4)   |
| O(2)-Ho(1)-O(1W)   | 92.85(15)  | Cu(2)-O(1)#5        | 2.408(4)   |
| O(3)-Ho(1)-O(1W)   | 156.03(12) | Cu(2)-O(1)          | 2.408(4)   |
| O(2)-Ho(1)-O(6)    | 79.73(13)  | N(3)#2-Cu(1)-N(3)   | 180.0(2)   |
| O(3)-Ho(1)-O(6)    | 79.04(13)  | N(3)#2-Cu(1)-N(5)#3 | 89.71(17)  |
| O(1W)-Ho(1)-O(6)   | 122.71(14) | N(3)-Cu(1)-N(5)#3   | 90.29(17)  |
| O(2)-Ho(1)-O(7)    | 125.56(12) | N(3)#2-Cu(1)-N(5)#4 | 90.29(17)  |
| O(3)-Ho(1)-O(7)    | 88.12(13)  | N(3)-Cu(1)-N(5)#4   | 89.71(17)  |
| O(1W)-Ho(1)-O(7)   | 76.96(14)  | N(5)#3-Cu(1)-N(5)#4 | 180.000(1) |
| O(6)-Ho(1)-O(7)    | 149.52(13) | N(3)#2-Cu(1)-O(4)   | 104.30(14) |
| O(2)-Ho(1)-O(8)    | 71.91(12)  | N(3)-Cu(1)-O(4)     | 75.70(15)  |
| O(3)-Ho(1)-O(8)    | 78.26(13)  | N(5)#3-Cu(1)-O(4)   | 89.25(15)  |
| O(1W)-Ho(1)-O(8)   | 77.94(14)  | N(5)#4-Cu(1)-O(4)   | 90.75(14)  |
| O(6)-Ho(1)-O(8)    | 146.04(15) | N(3)#2-Cu(1)-O(4)#2 | 75.69(14)  |
| O(7)-Ho(1)-O(8)    | 53.65(13)  | N(3)-Cu(1)-O(4)#2   | 104.31(14) |
| O(2)-Ho(1)-O(5)    | 78.35(12)  | N(5)#3-Cu(1)-O(4)#2 | 90.75(15)  |
| O(3)-Ho(1)-O(5)    | 130.26(13) | N(5)#4-Cu(1)-O(4)#2 | 89.25(15)  |
| O(1W)-Ho(1)-O(5)   | 69.62(14)  | O(4)-Cu(1)-O(4)#2   | 180.0      |
| O(6)-Ho(1)-O(5)    | 53.17(14)  | N(1)-Cu(2)-N(1)#5   | 180.0(2)   |
| O(7)-Ho(1)-O(5)    | 140.00(14) | N(1)-Cu(2)-N(4)#6   | 90.70(17)  |
| O(8)-Ho(1)-O(5)    | 134.19(13) | N(1)#5-Cu(2)-N(4)#6 | 89.30(17)  |
| O(2)-Ho(1)-O(4)#1  | 155.73(11) | N(1)-Cu(2)-N(4)#7   | 89.30(17)  |
| O(3)-Ho(1)-O(4)#1  | 114.50(12) | N(1)#5-Cu(2)-N(4)#7 | 90.70(17)  |
| O(1W)-Ho(1)-O(4)#1 | 80.22(13)  | N(4)#6-Cu(2)-N(4)#7 | 180.0      |
| O(6)-Ho(1)-O(4)#1  | 84.53(12)  | N(1)-Cu(2)-O(1)#5   | 104.31(16) |
| O(7)-Ho(1)-O(4)#1  | 75.79(11)  | N(1)#5-Cu(2)-O(1)#5 | 75.69(16)  |
| O(8)-Ho(1)-O(4)#1  | 128.05(12) | N(4)#6-Cu(2)-O(1)#5 | 89.56(15)  |
| O(5)-Ho(1)-O(4)#1  | 77.43(11)  | N(4)#7-Cu(2)-O(1)#5 | 90.44(15)  |
| O(2)-Ho(1)-O(3)#1  | 138.97(14) | N(1)-Cu(2)-O(1)     | 75.68(16)  |
| O(3)-Ho(1)-O(3)#1  | 62.85(14)  | N(1)#5-Cu(2)-O(1)   | 104.32(16) |
| O(1W)-Ho(1)-O(3)#1 | 128.10(14) | N(4)#6-Cu(2)-O(1)   | 90.44(15)  |
| O(6)-Ho(1)-O(3)#1  | 75.82(12)  | N(4)#7-Cu(2)-O(1)   | 89.56(15)  |

|                   |            |                     |           |
|-------------------|------------|---------------------|-----------|
| O(7)-Ho(1)-O(3)#1 | 73.72(12)  | O(1)#5-Cu(2)-O(1)   | 180.0     |
| O(8)-Ho(1)-O(3)#1 | 114.67(12) | O(4)#1-Ho(1)-O(3)#1 | 51.65(12) |
| O(5)-Ho(1)-O(3)#1 | 110.71(11) |                     |           |

Symmetry codes for **1** : #1 -x+1,-y,-z+2      #2 -x+2,-y,-z+2      #3 -x+2,-y-1,-z+2  
 #4 x,y+1,z      #5 -x+2,-y,-z+1      #6 -x+1,-y+1,-z+1  
 #7 x+1,y-1,z      #8 x-1,y+1,z      #9 x,y-1,z

Symmetry codes for **2** : #1 -x+1,-y,-z+2      #2 -x+2,-y,-z+2      #3 -x+2,-y-1,-z+2  
 #4 x,y+1,z      #5 -x+2,-y,-z+1      #6 x+1,y-1,z  
 #7 -x+1,-y+1,-z+1      #8 x-1,y+1,z      #9 x,y-1,z

Symmetry codes for **3** : #1 -x+1,-y+2,-z+2      #2 x,y-1,z      #3 -x+2,-y+1,-z+2  
 #4 -x+2,-y,-z+2      #5 -x+1,-y+3,-z+1      #6 x-1,y+1,z  
 #7 -x,-y+4,-z+1      #8 x+1,y-1,z      #9 x,y+1,z

Symmetry codes for **4** : #1 -x+1,-y,-z+2      #2 -x+2,-y,-z+2      #3 -x+2,-y-1,-z+2  
 #4 x,y+1,z      #5 -x+2,-y,-z+1      #6 x+1,y-1,z  
 #7 -x+1,-y+1,-z+1      #8 x-1,y+1,z      #9 x,y-1,z

Symmetry codes for **5** : #1 -x+1,-y,-z+2      #2 -x+2,-y,-z+2      #3 x,y+1,z  
 #4 -x+2,-y-1,-z+2      #5 -x+2,-y,-z+1      #6 -x+1,-y+1,-z+1  
 #7 x+1,y-1,z      #8 x-1,y+1,z      #9 x,y-1,z

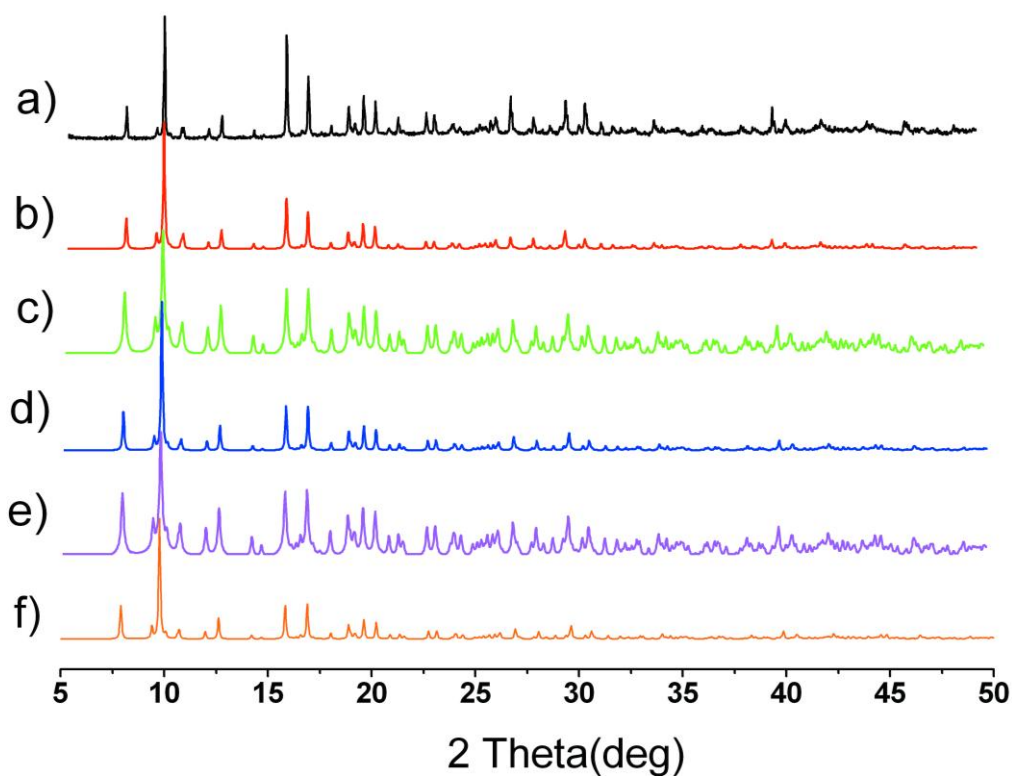

**Figure S1.** PXRD patterns (a) simulated based on the X-ray single-crystal diffraction data of **1**, (b) for as-synthesized **1**, (c) for as-synthesized **2**, (d) for as-synthesized **3**, (e) for as-synthesized **4**, and (f) for as-synthesized **5**.



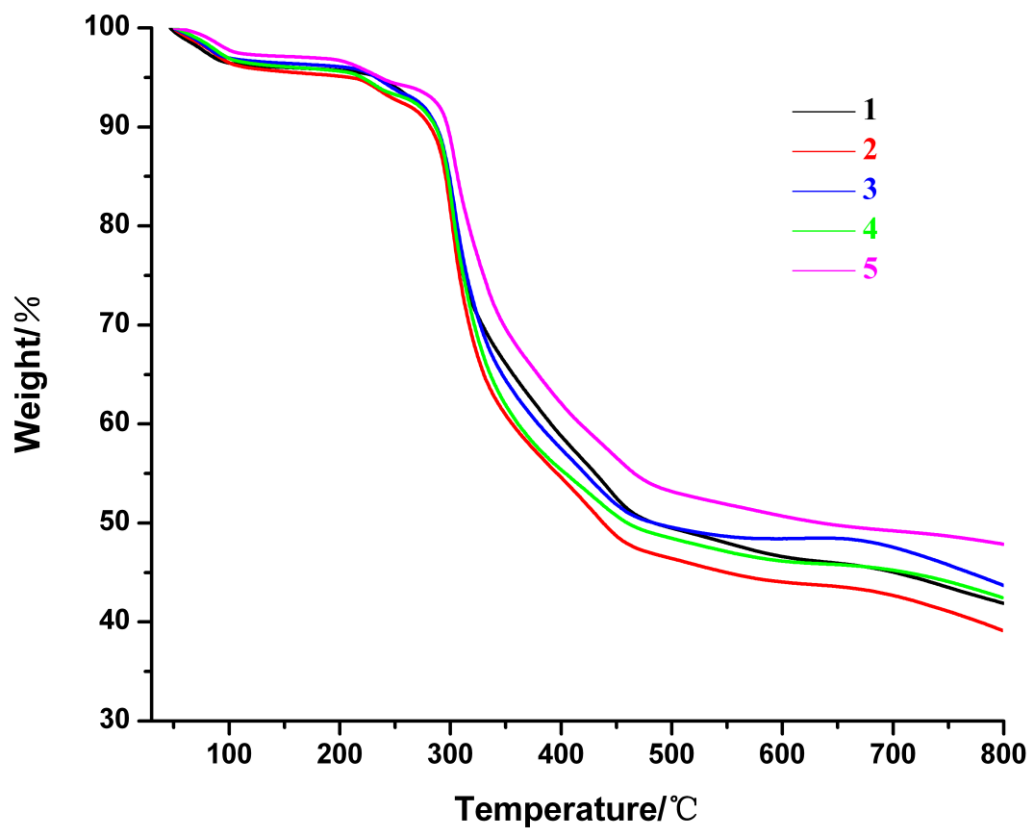

Figure S2. TG curve of complexes 1-5.

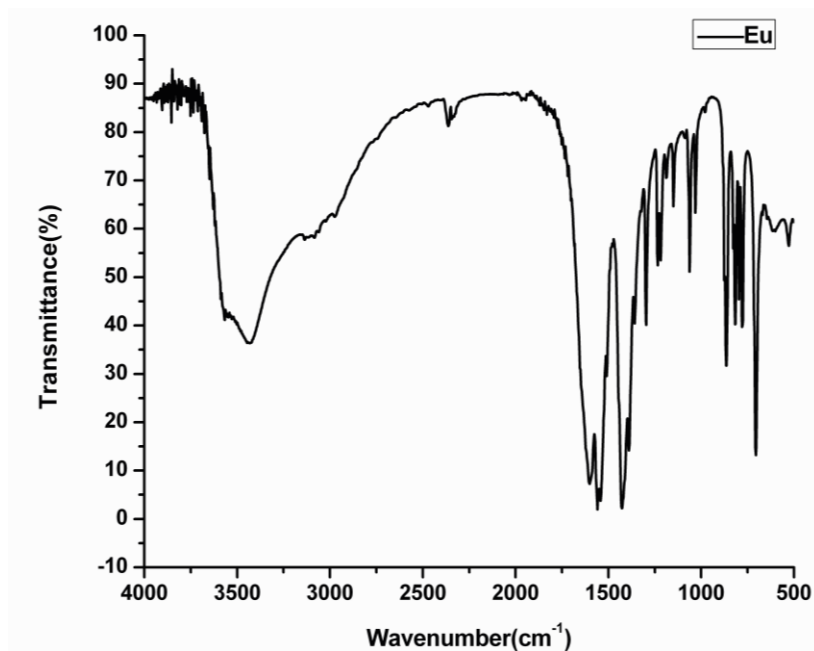

Figure S3. IR spectra of compound 1.

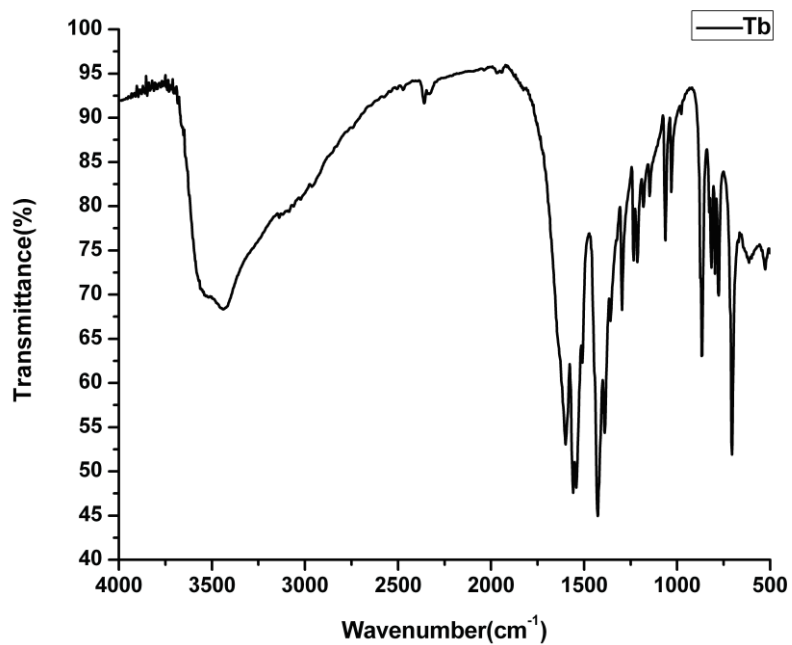

Figure S4. IR spectra of compound 2.

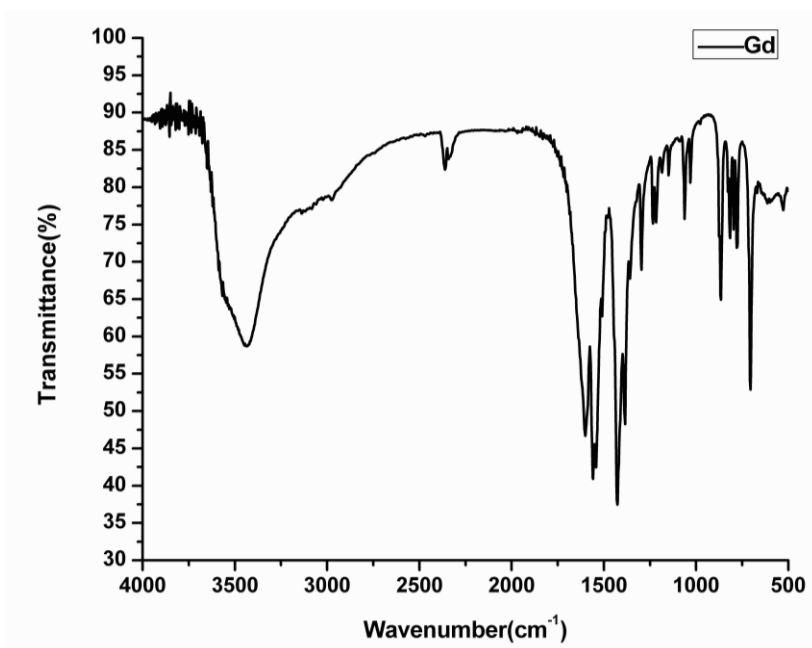

Figure S5. IR spectra of compound 3.

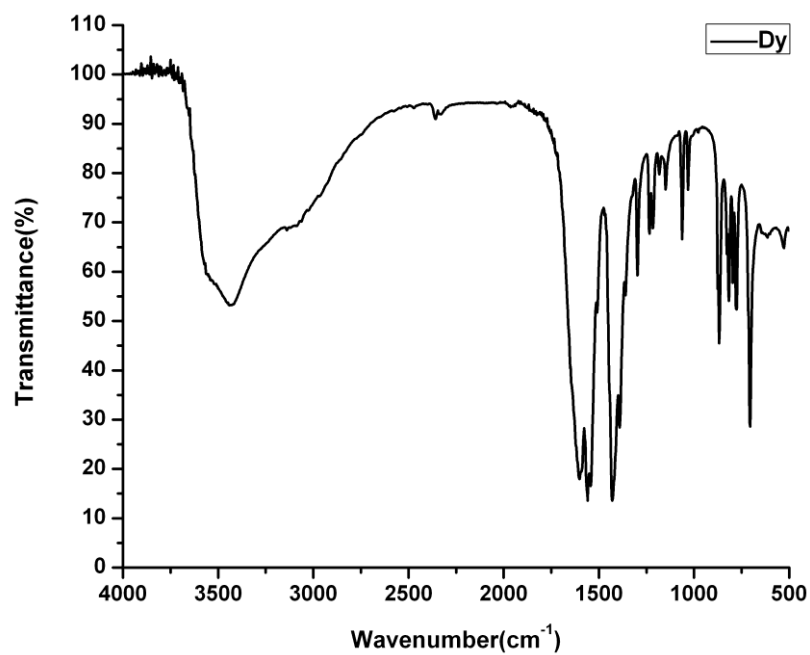

**Figure S6.** IR spectra of compound 4.

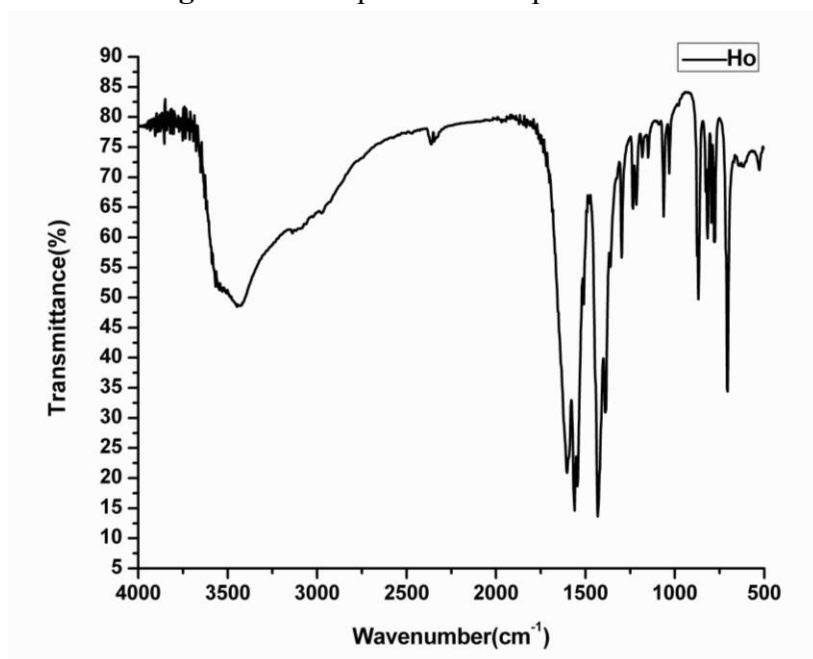

**Figure S7.** IR spectra of compound 5.
